# Supplementary material
Source: PubMed Central journal article supplement (PMC2531240)

**Supporting Information for:**

**Bolaamphiphiles Promote Phospholipid Translocation Across Vesicle  
Membranes**

**Christopher C. Forbes, Kristy M. DiVittorio, and Bradley D. Smith\***

Department of Chemistry and Biochemistry and the Walther Cancer Research Center,  
University of Notre Dame, Notre Dame, IN 46556, USA

\*Corresponding author: Email: smith.115@nd.edu, Ph: 574 631 8632, Fax: 574 631 6652

CONTENTS

<sup>1</sup>H NMR spectra for compounds **1 - 6**

Bolaamphiphile **1**  $^1\text{H}$  NMR  
 (500 MHz, 1:1  $\text{CDCl}_3$ ,  $\text{CD}_3\text{OD}$ )

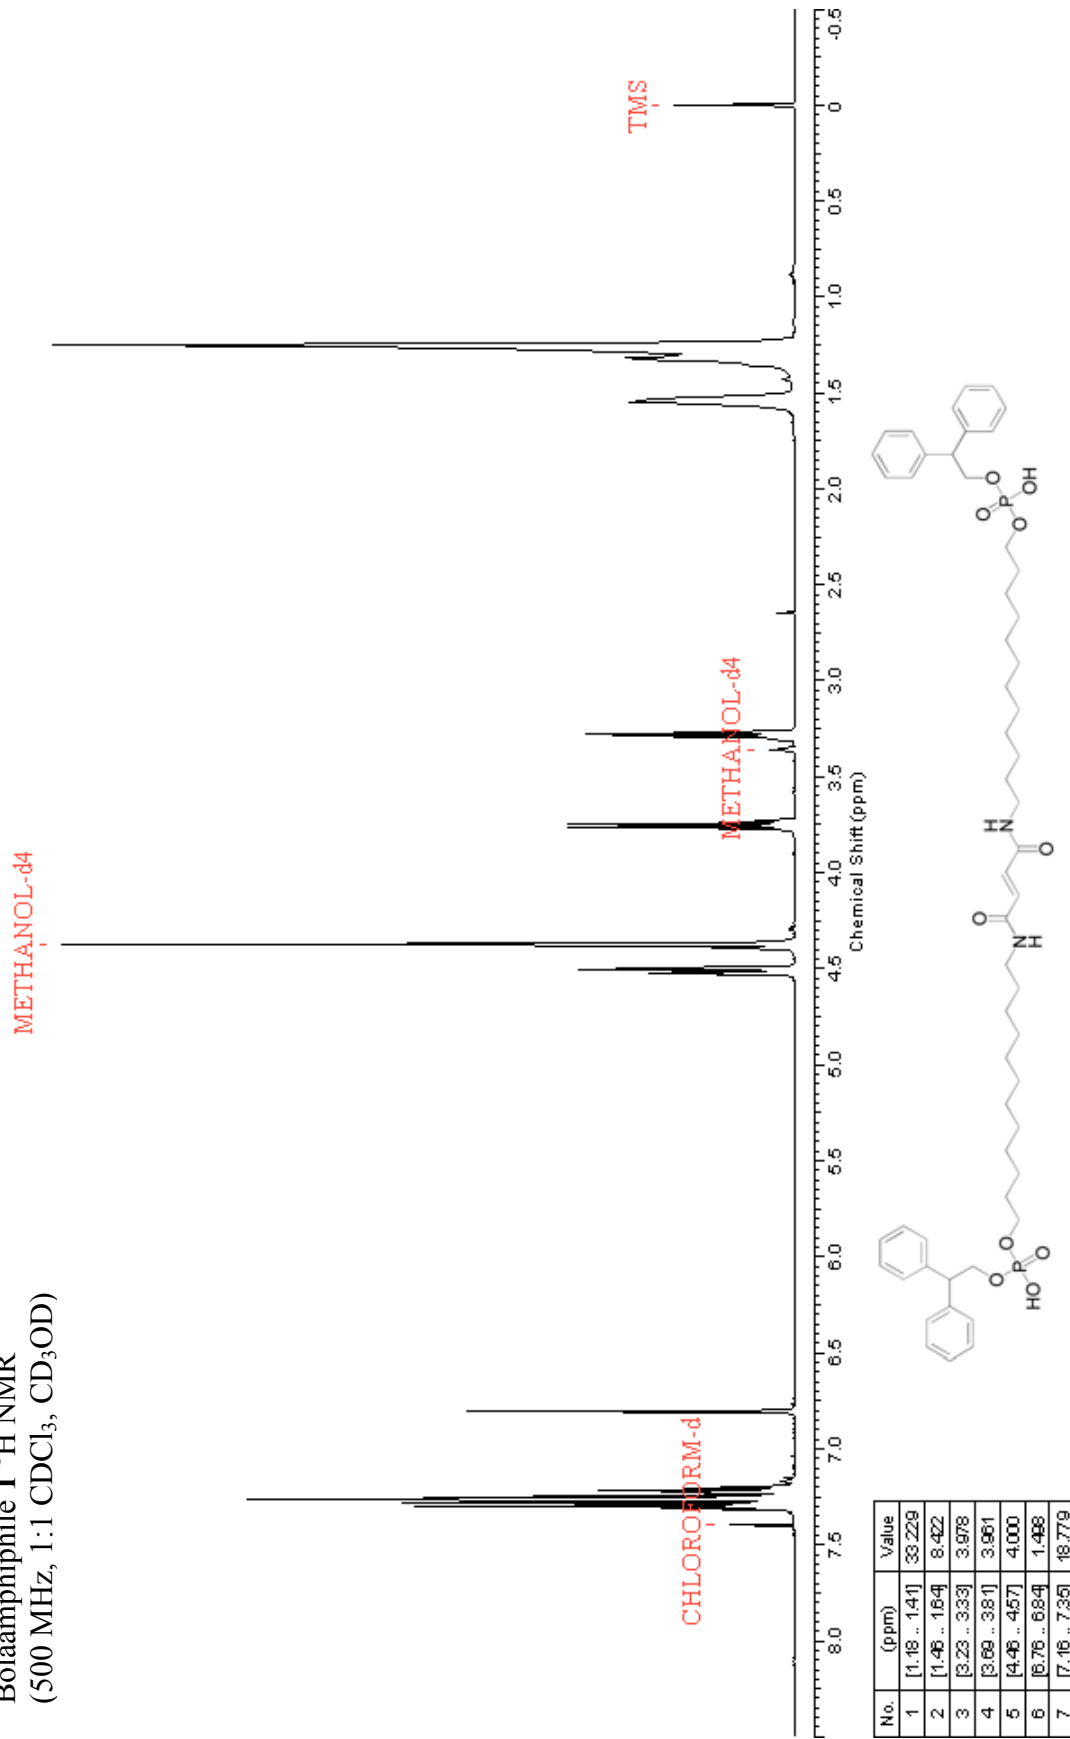

Rotaxane **2**  $^1\text{H}$  NMR (500 MHz, 3:1  $\text{CDCl}_3$ ,  $\text{CD}_3\text{OD}$ )

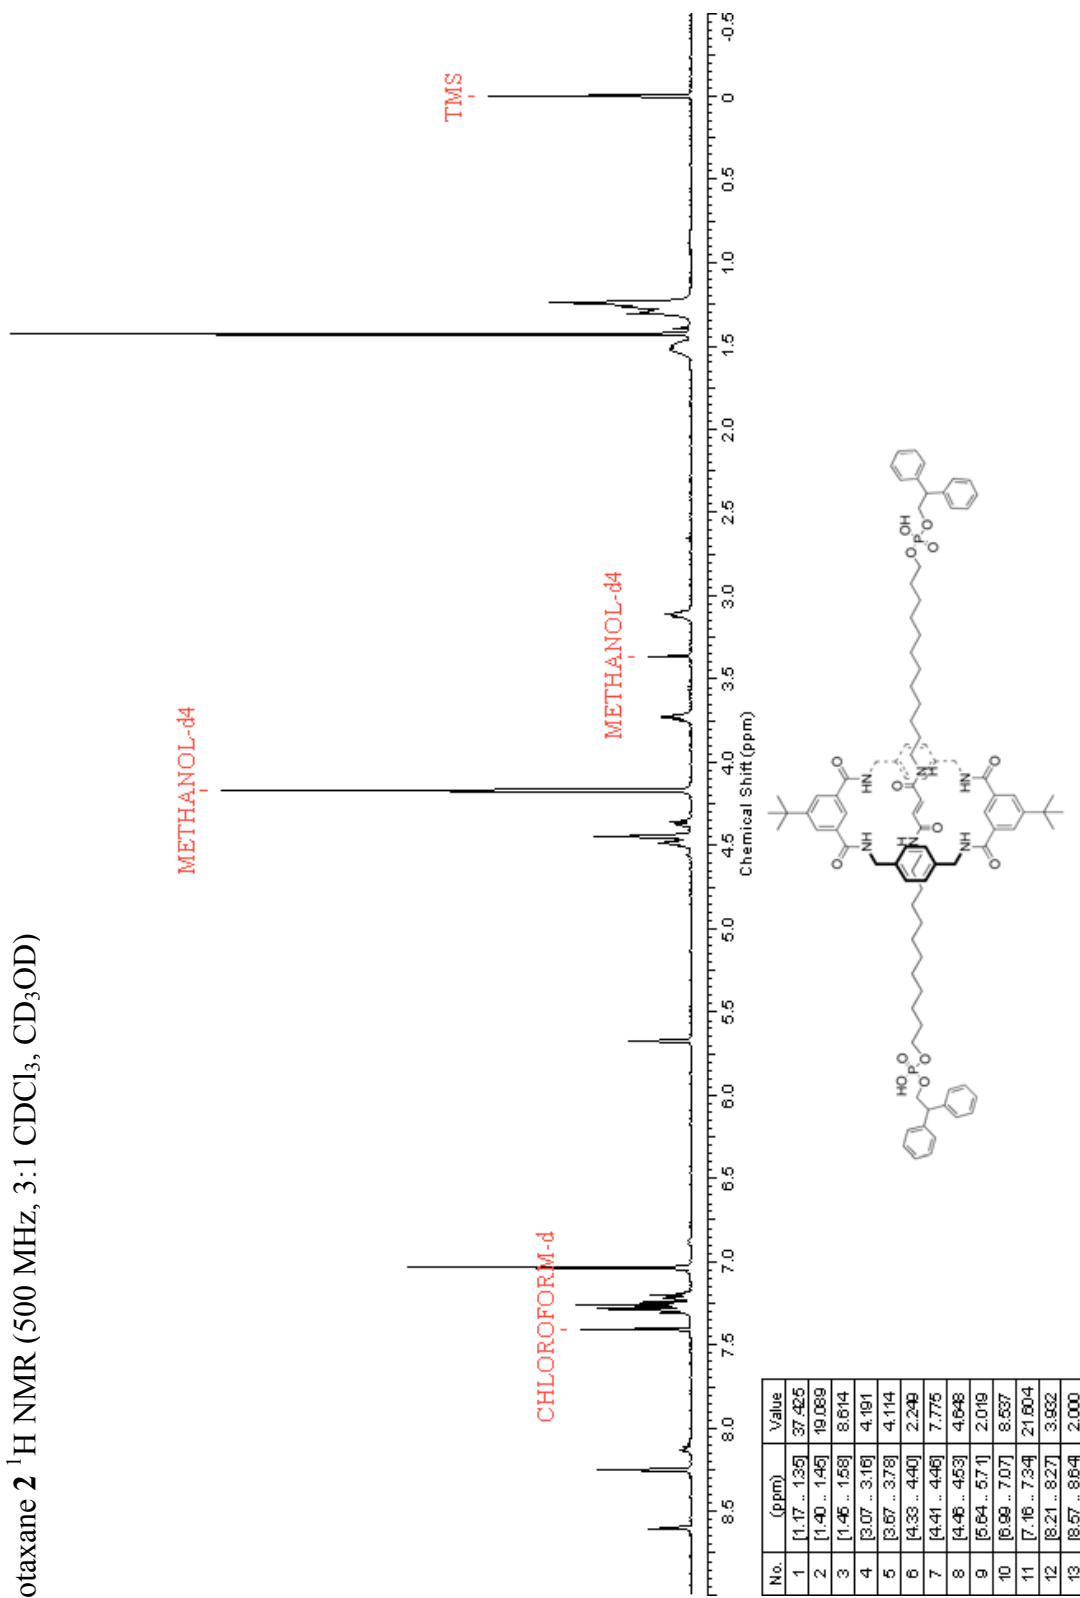

Bolaamphiphile **3**  $^1\text{H}$  NMR (500 MHz,  $\text{CDCl}_3$ )

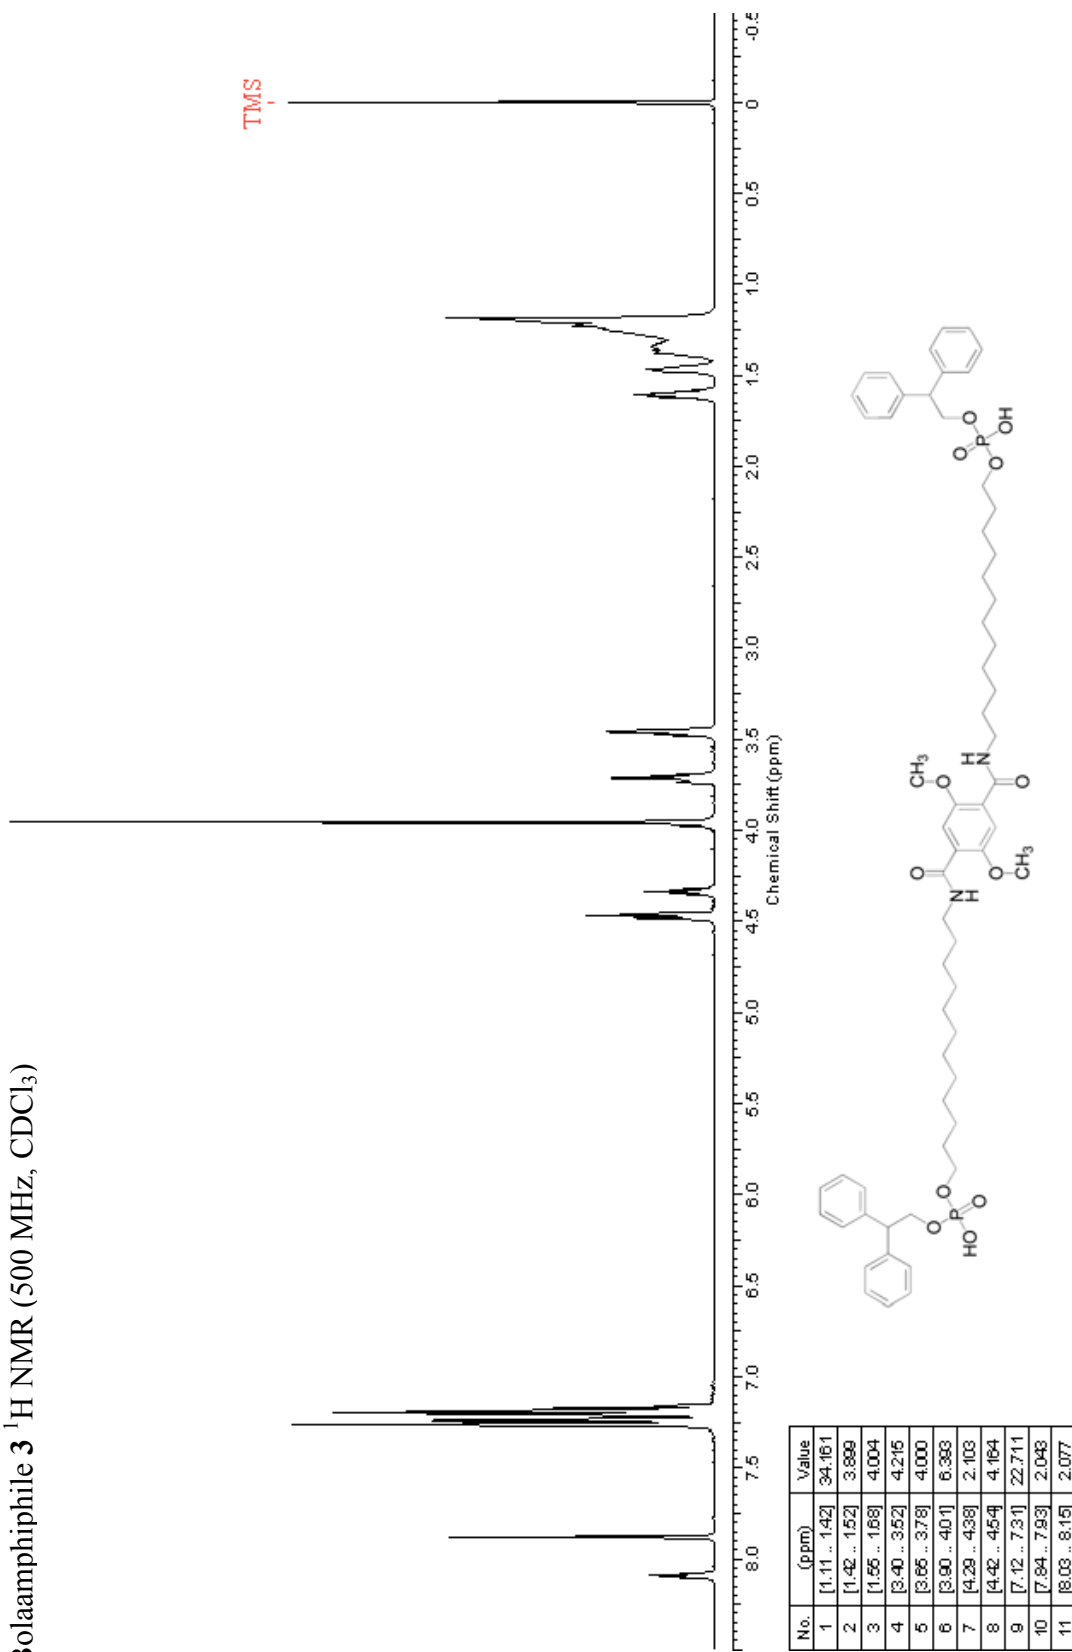

Bolaamphiphile 4 <sup>1</sup>H NMR (500 MHz, 3:1 CDCl<sub>3</sub>, CD<sub>3</sub>OD)

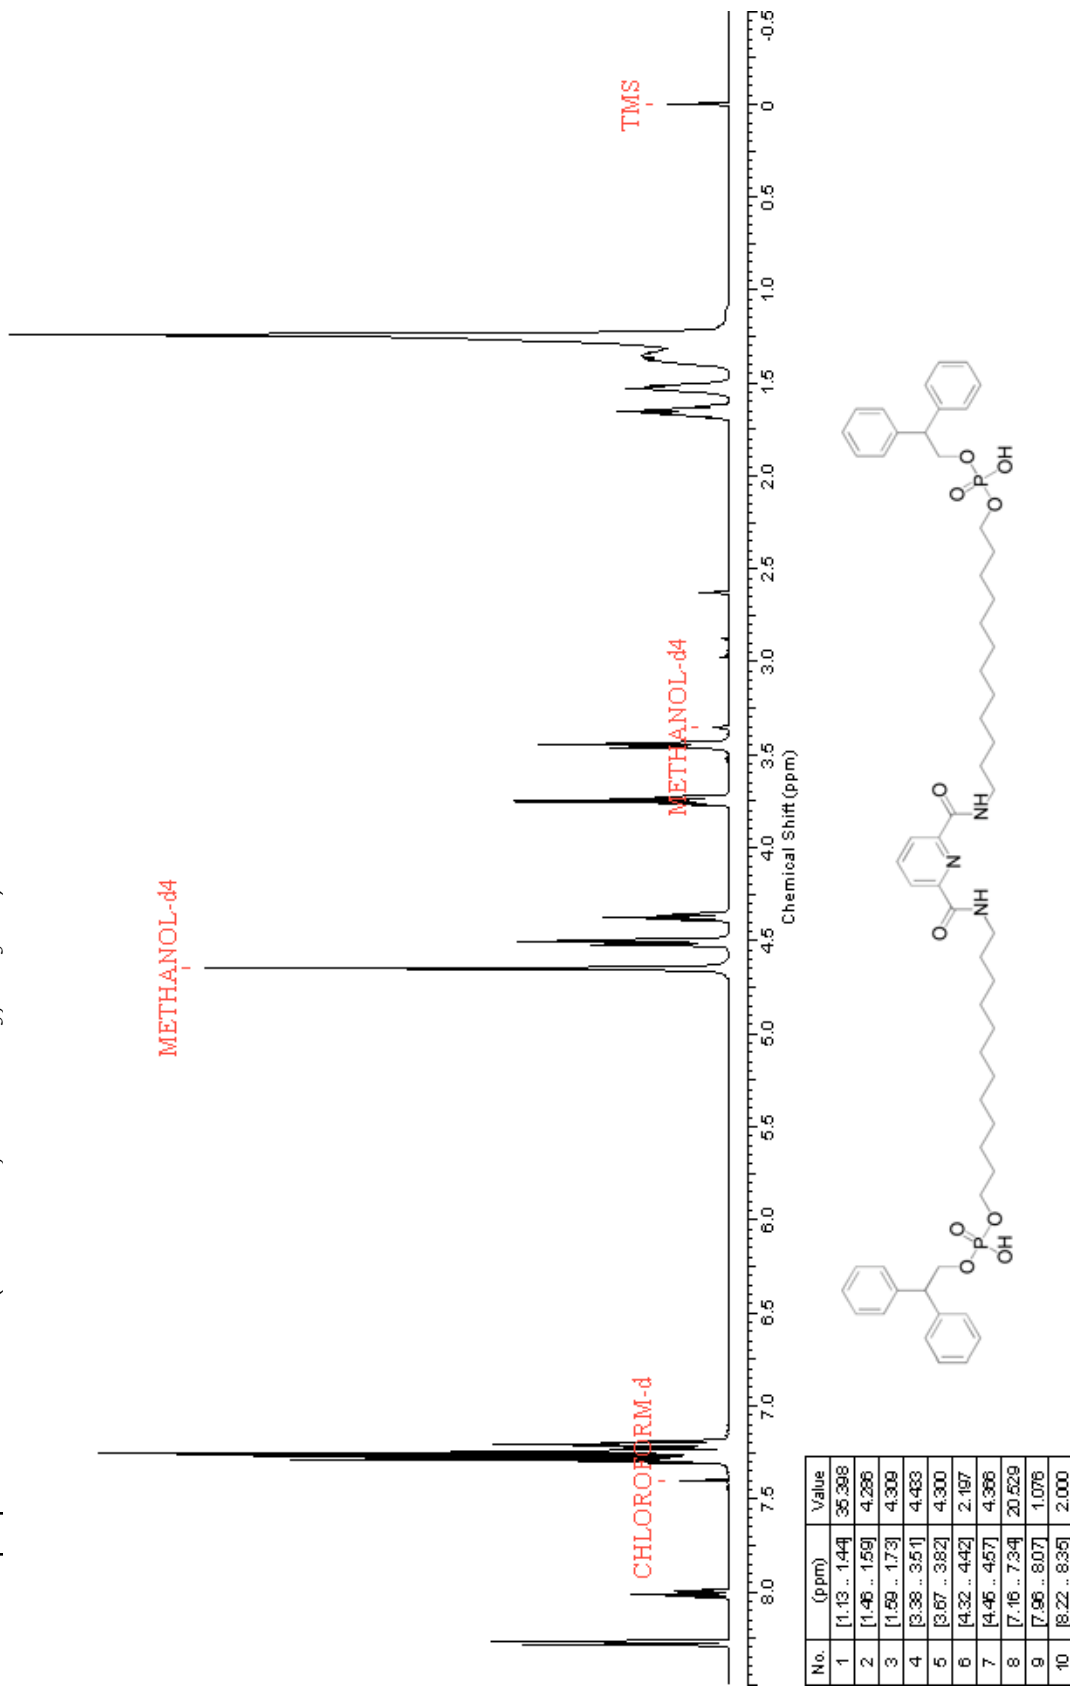

Bolaamphiphile **5** <sup>1</sup>H NMR (500 MHz, CD<sub>3</sub>OD)

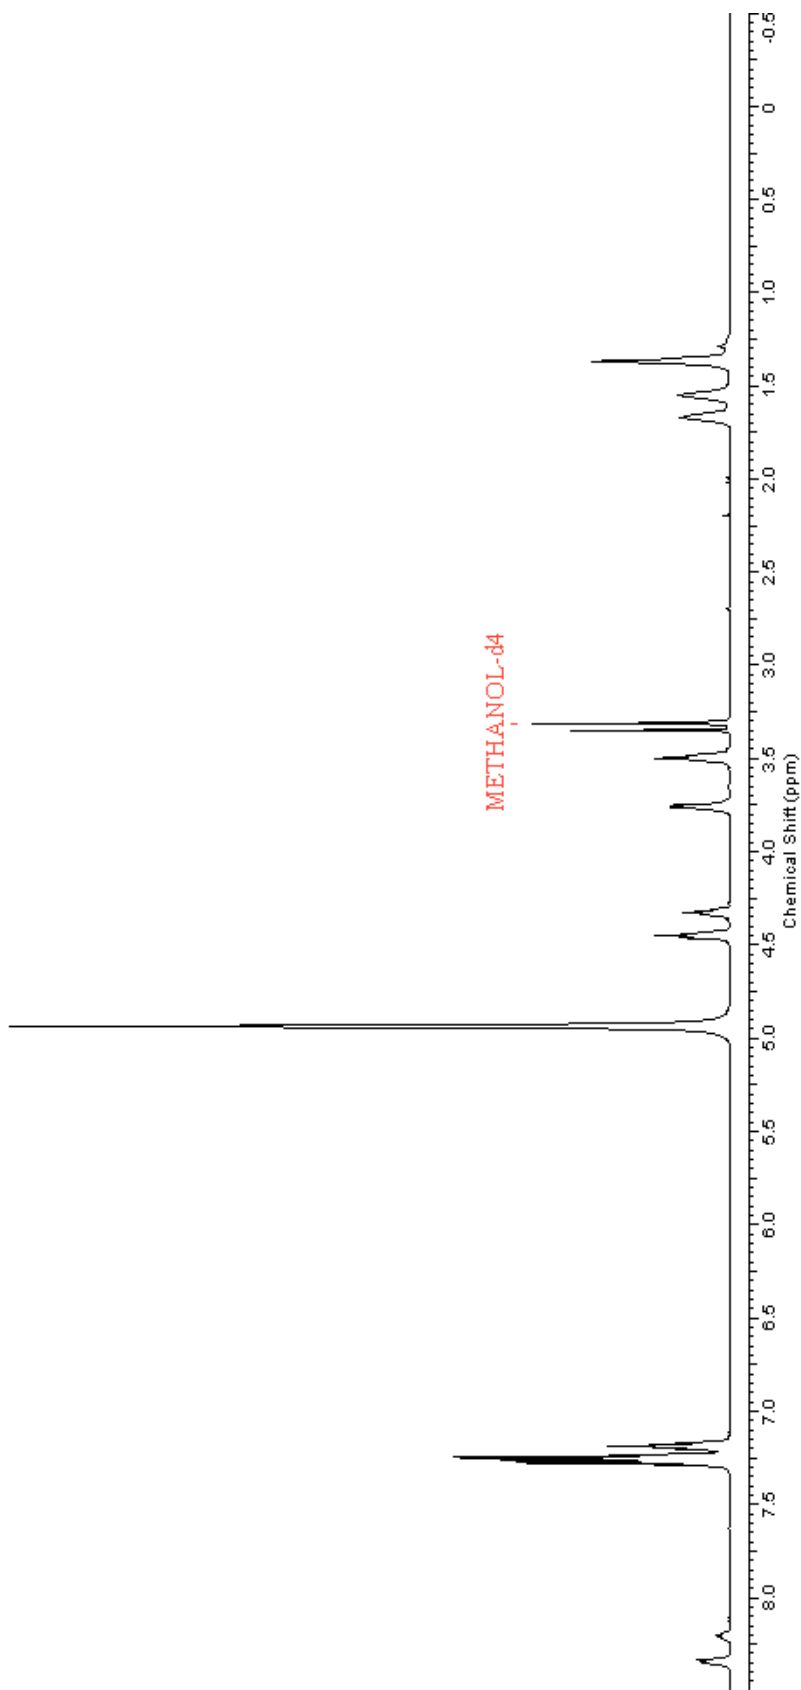

| No. | (ppm)          | Value  |
|-----|----------------|--------|
| 1   | [1.30 .. 1.43] | 8.221  |
| 2   | [1.48 .. 1.60] | 4.138  |
| 3   | [1.60 .. 1.75] | 4.131  |
| 4   | [3.43 .. 3.55] | 4.149  |
| 5   | [3.68 .. 3.82] | 4.000  |
| 6   | [4.26 .. 4.36] | 2.289  |
| 7   | [4.39 .. 4.54] | 4.008  |
| 8   | [7.13 .. 7.33] | 22.129 |
| 9   | [8.14 .. 8.27] | 0.929  |
| 10  | [8.29 .. 8.41] | 1.869  |

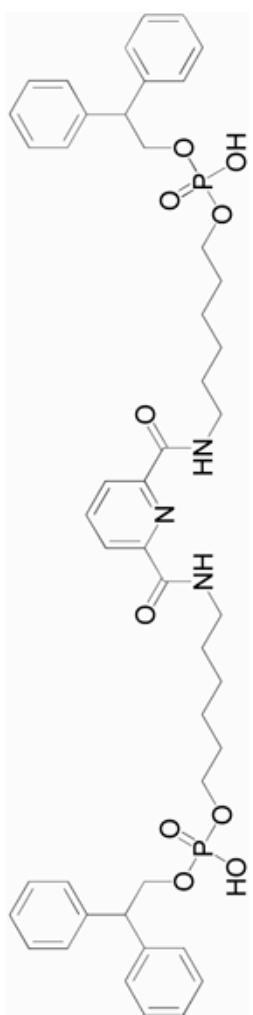

Amphiphile **6**  $^1\text{H}$  NMR (500 MHz,  $\text{CDCl}_3$ )

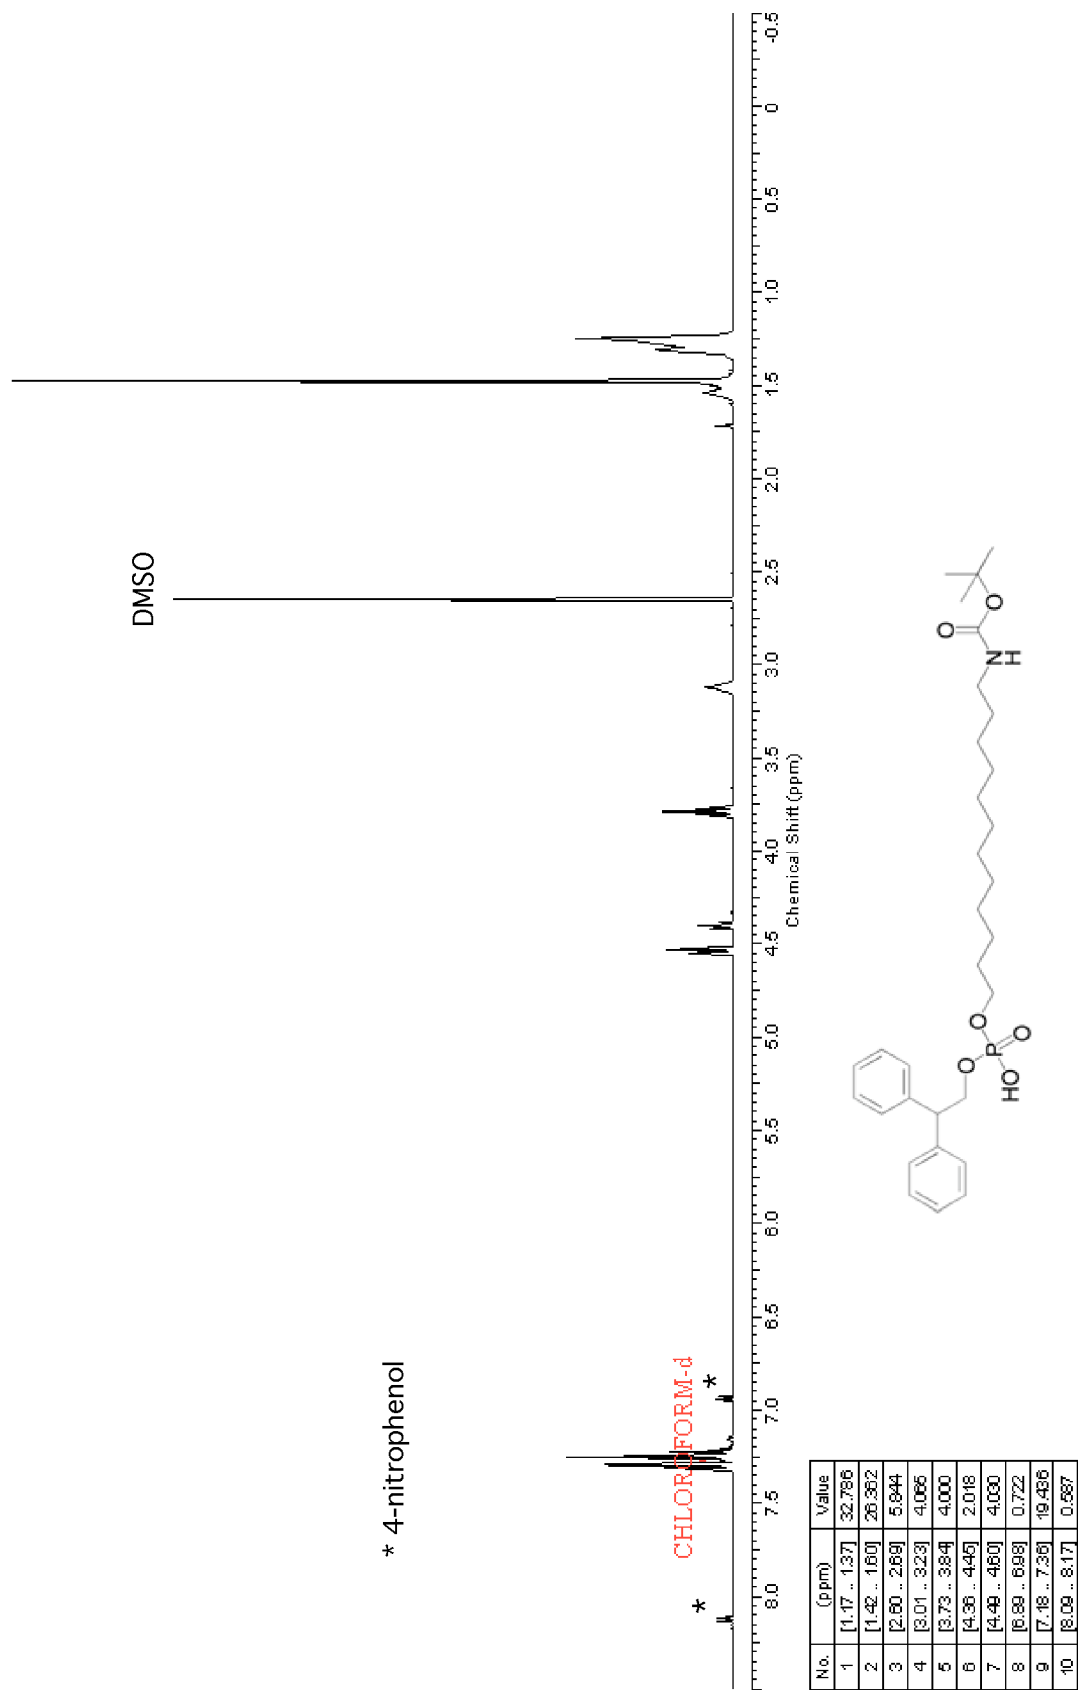

Supplement: NIHMS61189-supplement-si20060321_113.pdf [file NIHMS61189-supplement-si20060321_113.pdf]
